# Supplementary material
Source: PubMed Central journal article supplement (PMC1606625)

### **Supplemental Figure Legend**

Supplemental Figure 1. Analysis of muscle regeneration following cardiotoxin injection in (A) 4 month and (B) 8.5 month old mice. The gastrocnemius was injected with cardiotoxin and histopathology was assessed 10 days later by H&E staining. All mice received bilateral injections of cardiotoxin or PBS vehicle as a control, hence doubling the number of muscles analyzed per animal. Two independent panels from different animals are shown for each experimental condition. Wt mice were injected with PBS (N=2) or cardiotoxin (N=2-3), while *scgd*<sup>-/-</sup> mice were injected with PBS (N=2-3) or cardiotoxin (N=4-7). CTX=cardiotoxin

**A**

4 Months

WT PBS

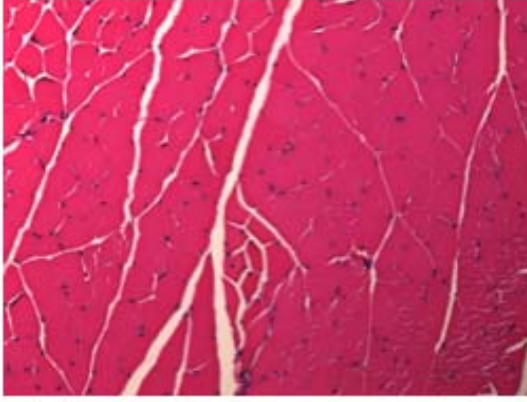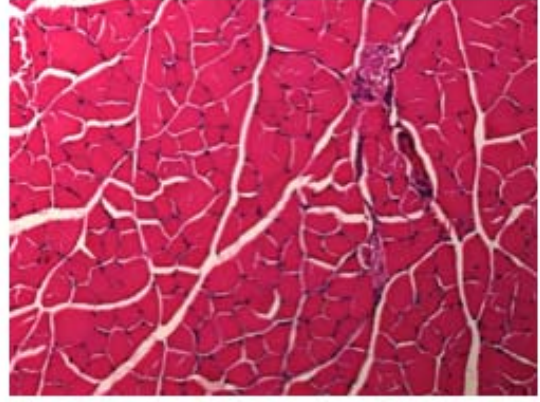

WT CTX

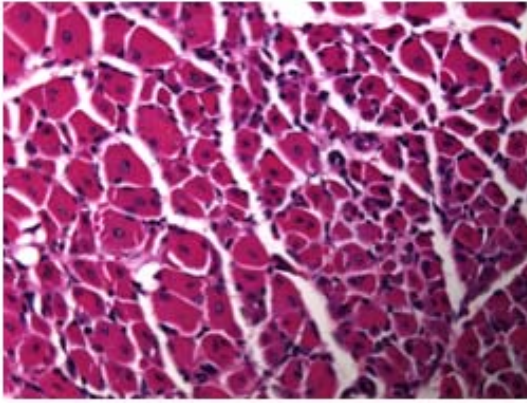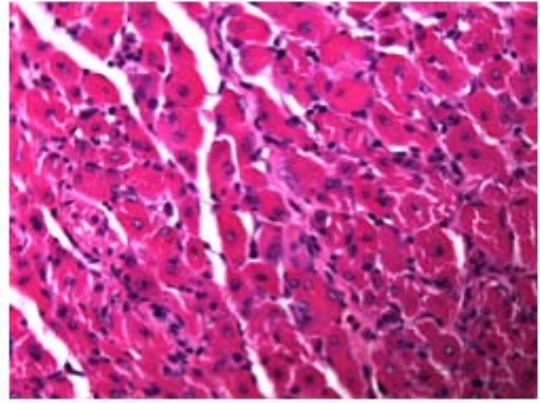

*scgd*<sup>-/-</sup> PBS

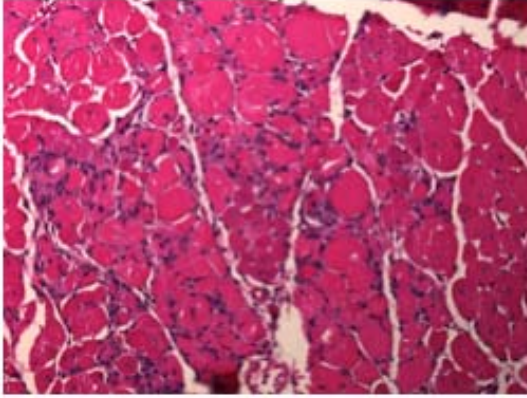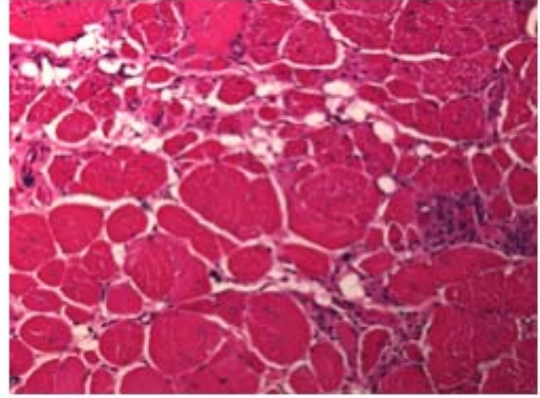

*scgd*<sup>-/-</sup> CTX

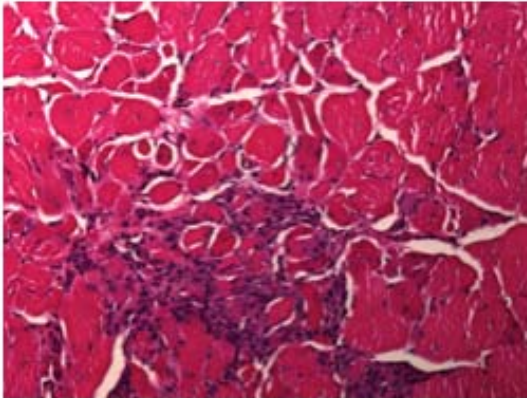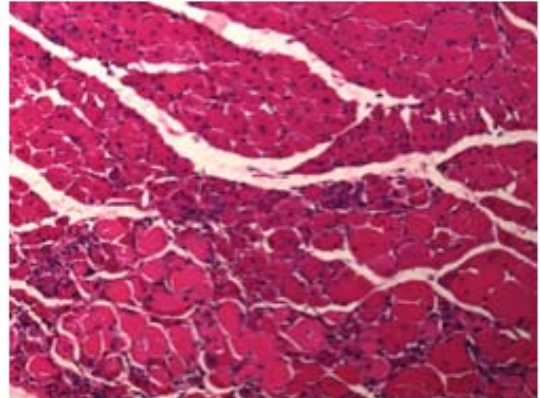



**B**

8.5 Months

WT PBS

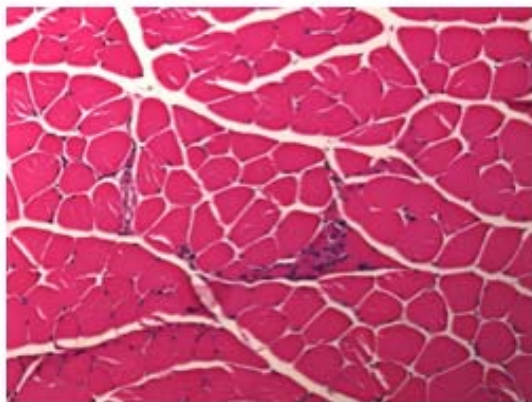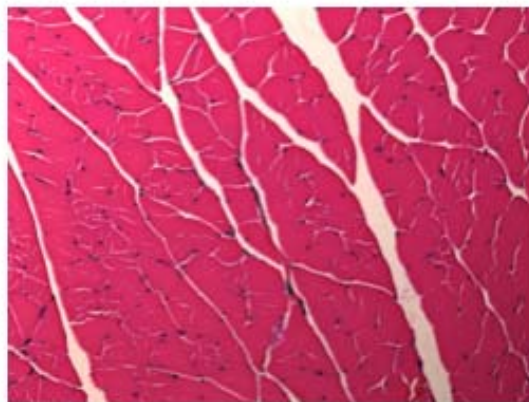

WT CTX

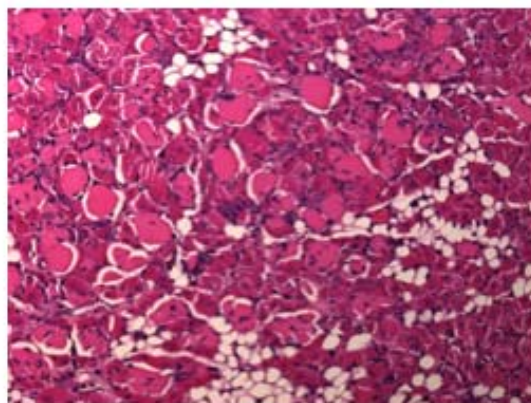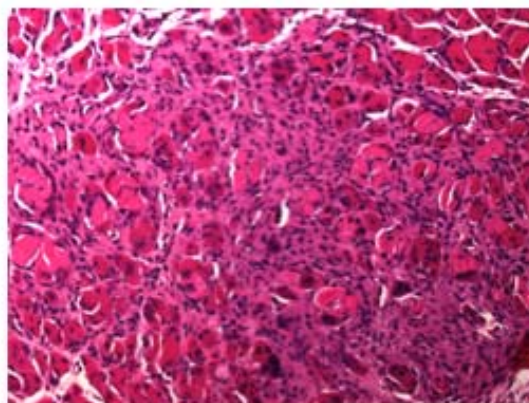

*scgd*<sup>-/-</sup> PBS

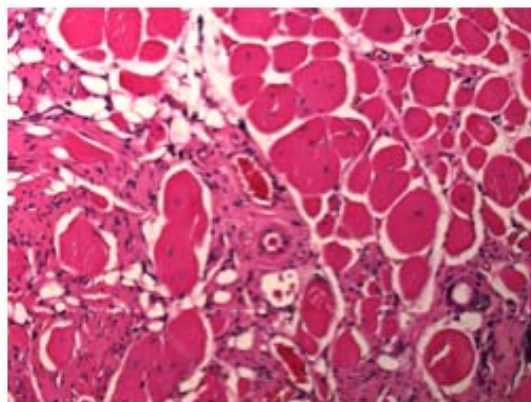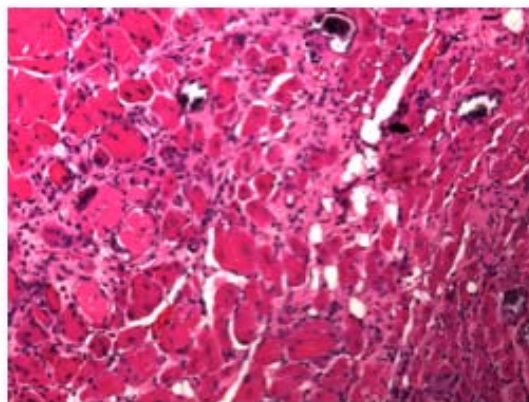

*scgd*<sup>-/-</sup> CTX

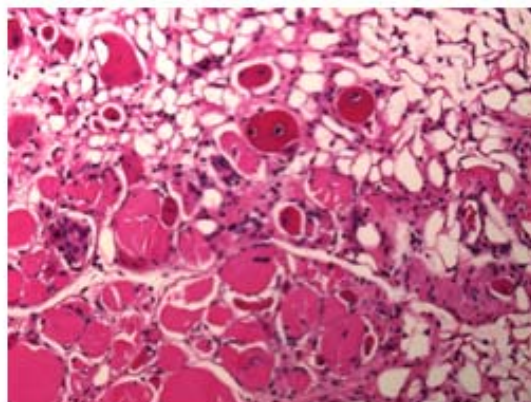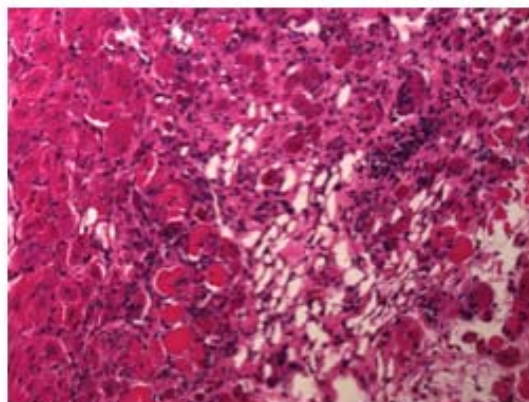

Supplement: amjpathol_168_6_1975__1.pdf [file amjpathol_168_6_1975__1.pdf]
